# Supplementary material for: Comprehensive Meta-analysis of Ontology Annotated 16S rRNA Profiles Identifies Beta Diversity Clusters of Environmental Bacterial Communities
Source: PubMed Central journal article supplement (PMC4601763; doi:10.1371/journal.pcbi.1004468), 2015-10-12
Supplement: pcbi.1004468.s007.pdf [file pcbi.1004468.s007.pdf]

| Study               | Samples | Total Sequence Count | Total Sequences Clustered against Green genes | Not Clustered against Green genes |
|---------------------|---------|----------------------|-----------------------------------------------|-----------------------------------|
| Mangroves           | 5       | 321317               | 211353                                        | 109964                            |
| Waste water         | 6       | 365782               | 243704                                        | 122078                            |
| Soil                | 10      | 158184               | 64540                                         | 93644                             |
| Salt flat           | 3       | 205174               | 172295                                        | 32879                             |
| Crab gut            | 6       | 947847               | 462878                                        | 484969                            |
| <b>Total</b>        | 30      | 1998304              | 1154770                                       | 843534                            |
| <b>Percentage %</b> |         |                      | 57.7875038                                    | 42.2124962                        |

**Table 1. Number of dropped sequences from inhouse samples.**
